# Supplementary material for: In Vitro Reconstitution Defines the Minimal Requirements for Cdc48-Dependent Disassembly of the CMG Helicase in Budding Yeast
Source: PubMed Central journal article supplement (PMC6899518; doi:10.1016/j.celrep.2019.08.026), 2019-09-10
Supplement: mmc1.pdf [file mmc1.pdf]

Cell Reports, Volume 28

**Supplemental Information**

***In Vitro* Reconstitution Defines the Minimal  
Requirements for Cdc48-Dependent Disassembly  
of the CMG Helicase in Budding Yeast**

**Progya P. Mukherjee and Karim P.M. Labib**

Figure S1, related to Figures 1-4

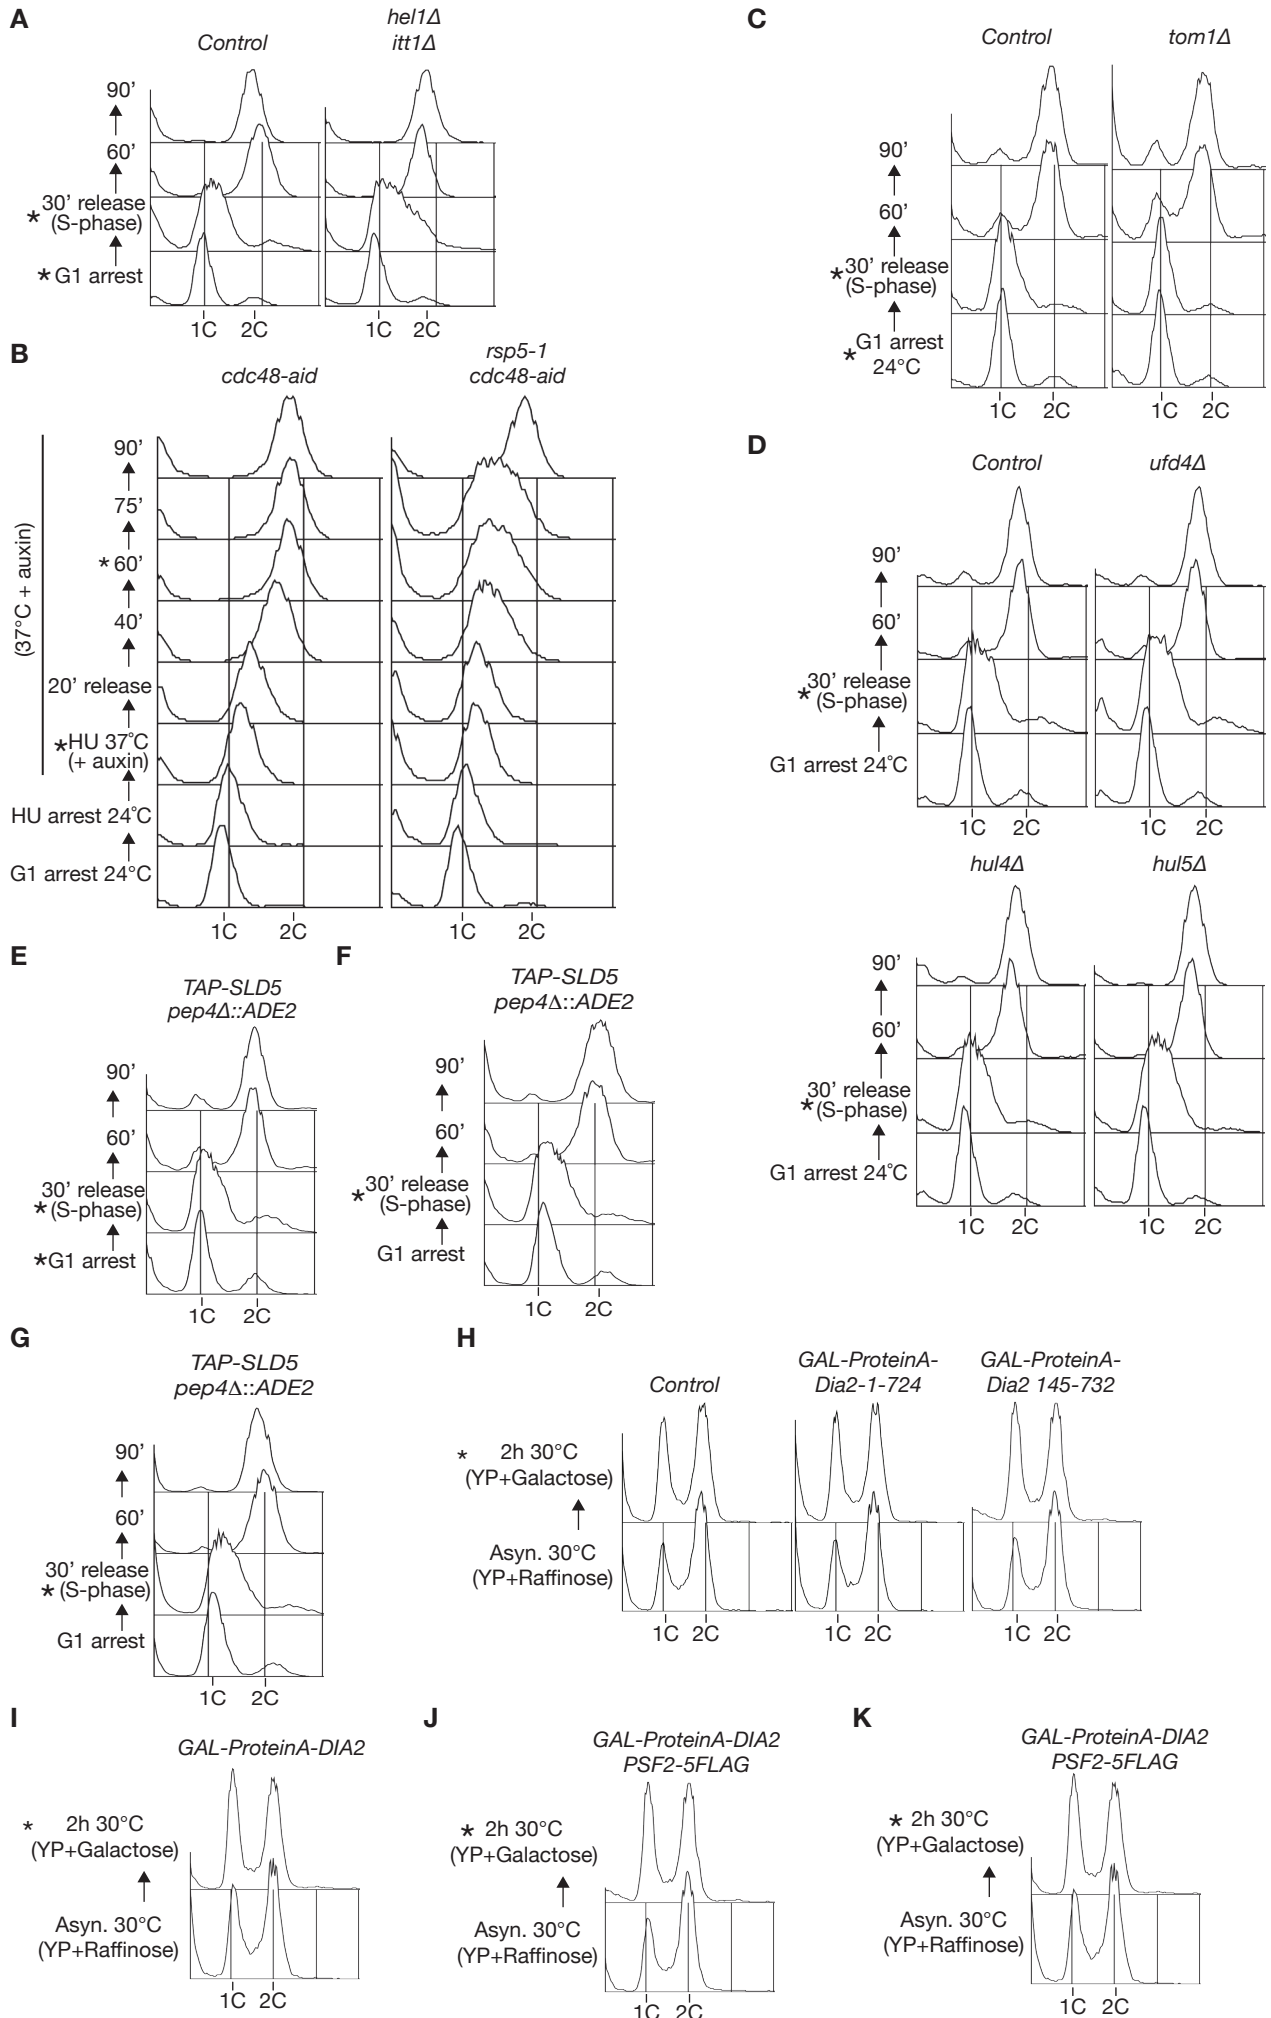

**Flow cytometry data for experiments in this study.**

The figure presents flow cytometry data for the experiments in Figure 1A-D (A-D),

Figure 2A-C (E-G), Figure 4A-B (H-I), Figure 4B-C (J-K). The samples marked with asterisks were used to prepare cell extracts.

Figure S2, related to Figures 1-2

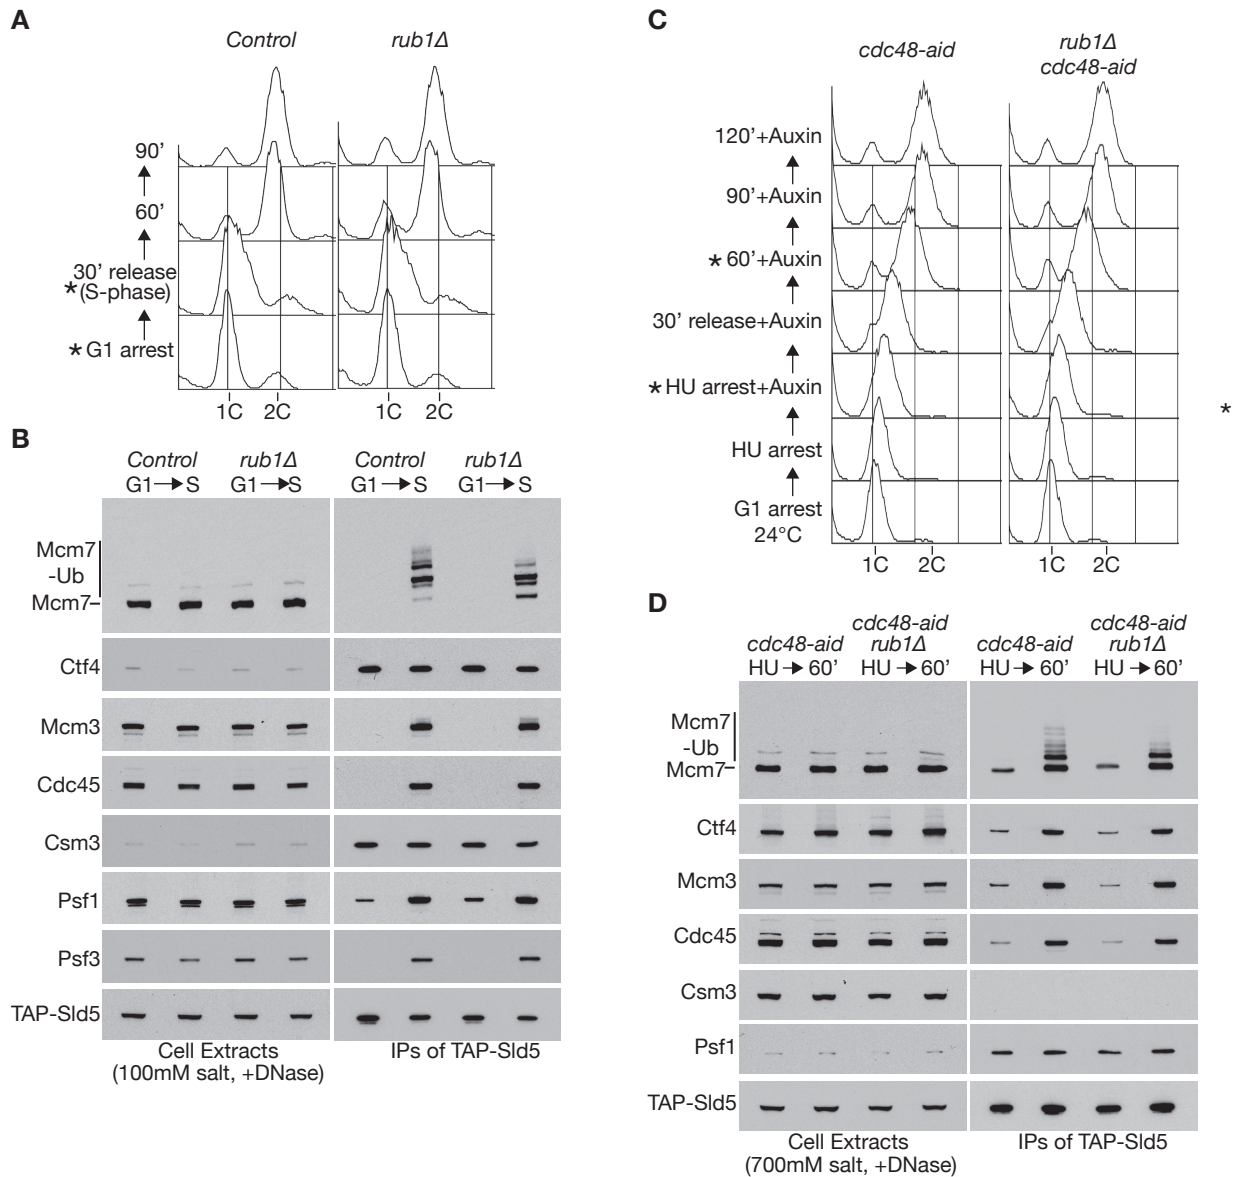

**Cullin neddylation is not essential for CMG helicase ubiquitylation in budding yeast.**

(A) Control (YSS47) and *rub1Δ* (YPM35) cells

were grown at 24°C, synchronised in G1 phase by addition of mating pheromone, and then released into S phase. Samples were taken at the indicated times and processed for flow-cytometry. The samples marked with asterisks were used to make cell extracts. (B) Samples from the same experiments were used to monitor CMG helicase ubiquitylation in yeast cell extracts, as in Figure 1A. (C) *cdc48-aid* control cells (YMM228) and *cdc48-aid rub1Δ* cells (YPM29) were grown at 24°C, synchronised in G1 phase by addition of mating pheromone, and then released into medium containing 0.2 M hydroxyurea (HU) at 24°C, until more than 80% of the cells had budded. The auxin indoleacetic acid was then added to 500 μM, in order to deplete Cdc48-aid. The cultures were subsequently released into fresh medium containing auxin but lacking HU, so that cells were able to complete S phase. Samples were taken at the indicated times and processed for flow-cytometry. The samples marked with asterisks were also used to prepare 'high-salt' cell extracts (containing 700mM potassium acetate), in order to monitor *in vivo* CMG ubiquitylation in the absence of *in vitro* ubiquitylation. (D) TAP-Sld5 was isolated by immunoprecipitation from extracts of the indicated samples from (C).

Figure S3, related to Figures 3-4

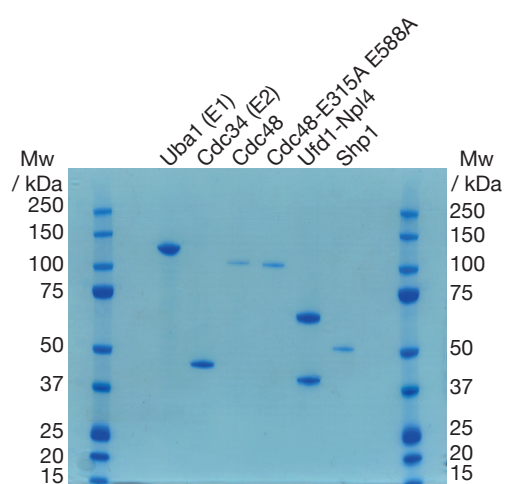

**Purified proteins employed in this study.**

The indicated factors were expressed in recombinant form and purified as described in Methods, before resolution in a 4-12% Bis-Tris gel, and staining with colloidal Coomassie blue.

Figure S4, related to Figure 3

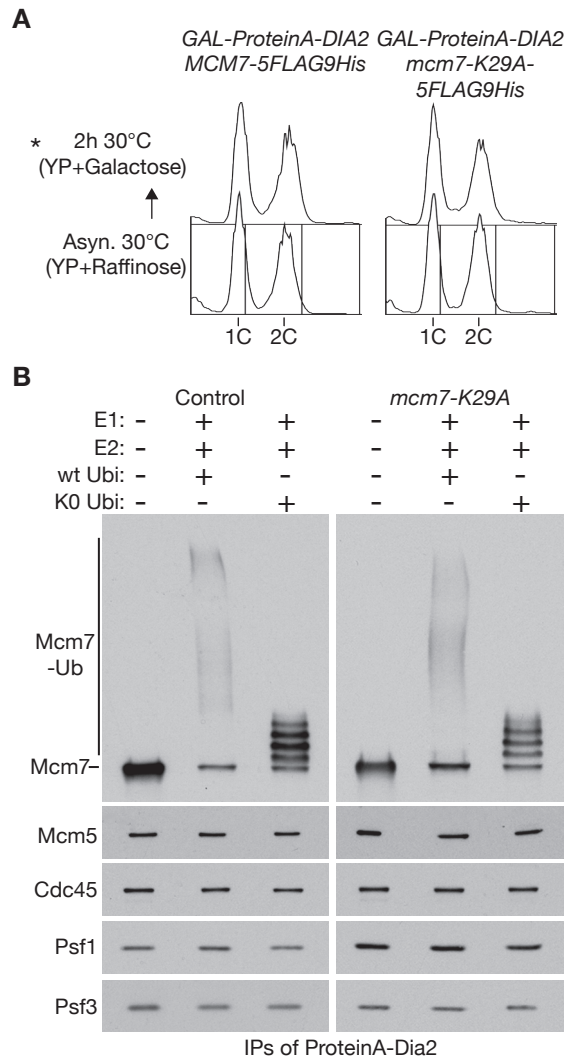

***In vitro* ubiquitylation of the CMG helicase within isolated complexes of SCF<sup>Dia2</sup>-replisome is not restricted to lysine 29 of Mcm7.**  
**(A)** Strains expressing *GAL-ProteinA-TEV-DIA2 MCM7-5FLAG9His* (YPM182) or *GAL-ProteinA-TEV-DIA2 mcm7-K29A-5FLAG9His* (YPM164), were grown at 30°C in raffinose-containing media until mid-exponential phase. The ProteinA-tagged versions of Dia2 were then induced by addition of galactose for 2 hours. Samples were taken at the indicated times and processed for flow-cytometry. The samples marked with asterisks were also used to prepare cell extracts. **(B)** ProteinA-tagged Dia2 was then isolated and processed as in Figure 3B, either using 50 μM wild type ubiquitin (wt Ubi) or 50 μM lysine-free ubiquitin (K0 Ubi), before immunoblotting of the indicated factors.

| <b>Strain</b> | <b>Genotype</b>                                                                                                                              |
|---------------|----------------------------------------------------------------------------------------------------------------------------------------------|
| W303-1        | <i>MATa ade2-1 ura3-1 his3-11,15 trp1-1 leu2-3,112 can1-100 / MAT<math>\alpha</math> ade2-1 ura3-1 his3-11,15 trp1-1 leu2-3,112 can1-100</i> |
| W303-1a       | <i>MATa ade2-1 ura3-1 his3-11,15 trp1-1 leu2-3,112 can1-100</i>                                                                              |
| YSS47         | <i>MATa TAP-SLD5 (kanMX) pep4<math>\Delta</math>::ADE2</i>                                                                                   |
| YTM418        | <i>MATa ura3::GAL-ProteinA-3TEV-DIA2 pep4<math>\Delta</math>::ADE2</i>                                                                       |
| YTM495        | <i>MATa ura3::GAL-ProteinA-3TEV-Dia2-(145-732) pep4<math>\Delta</math>::ADE2</i>                                                             |
| YMM228        | <i>MATa TAP-SLD5 (kanMX) cdc48-aid (hphNT) ADH1-O.s.TIR1-9MYC (URA3 &amp; K.I.TRP1) ADE2 pep4<math>\Delta</math>::URA3</i>                   |
| YSS3          | <i>MATa pep4<math>\Delta</math>::ADE2</i>                                                                                                    |
| YPM29         | <i>MATa rub1<math>\Delta</math>::K.I.TRP1 TAP-SLD5 (kanMX) cdc48-aid (hphNT) ADH-O.s.TIR1-9MYC (URA3) pep4<math>\Delta</math>::ADE2</i>      |
| YPM35         | <i>MATa rub1<math>\Delta</math>::K.I.TRP1 TAP-SLD5 pep4<math>\Delta</math>::ADE2</i>                                                         |
| YPM44         | <i>MATa tom1<math>\Delta</math>::URA3 TAP-SLD5 pep4<math>\Delta</math>::ADE2</i>                                                             |
| YPM106        | <i>MATa hel1<math>\Delta</math>::K.I.TRP1 TAP-SLD5 (kanMX) pep4<math>\Delta</math>::ADE2</i>                                                 |
| YPM122        | <i>MATa itt1<math>\Delta</math>::URA3 TAP-SLD5 (kanMX) pep4<math>\Delta</math>::ADE2</i>                                                     |
| YPM141        | <i>MATa hel1<math>\Delta</math>::K.I.TRP1 itt1<math>\Delta</math>::URA3 TAP-SLD5 (kanMX) pep4<math>\Delta</math>::ADE2</i>                   |
| YPM150        | <i>MATa ufd4<math>\Delta</math>::URA3 TAP-SLD5 (kanMX) pep4<math>\Delta</math>::ADE2</i>                                                     |
| YPM153        | <i>MATa rsp5-1 TAP-SLD5 (kanMX) pep4<math>\Delta</math>::ADE2</i>                                                                            |
| YPM157        | <i>MATa ura3::GAL-ProteinA-3TEV-DIA2 PSF2-5FLAG (hphNT) pep4<math>\Delta</math>::ADE2</i>                                                    |

|        |                                                                                                       |
|--------|-------------------------------------------------------------------------------------------------------|
| YPM164 | <i>MATa ura3::GAL-ProteinA-3TEV-DIA2 (URA3) mcm7-K29A-5FLAG9His (hphNT) pep4Δ::ADE2</i>               |
| YPM174 | <i>MATa rsp5-1 TAP-SLD5 (kanMX) cdc48-aid (hphNT) ADH1-O.s.TIR1 (URA3 &amp; K.I.TRP1) pep4Δ::ADE2</i> |
| YPM182 | <i>MATa ura3::GAL-PrA-3TEV-DIA2 MCM7-5FLAG9HIS (hphNT) pep4Δ::ADE2</i>                                |
| YPM192 | <i>MATa hul4Δ::K.I.TRP1 TAP-SLD5 (kanMX) pep4Δ::ADE2</i>                                              |
| YPM195 | <i>MATa hul5Δ::HIS3 TAP-SLD5 (kanMX) pep4Δ::ADE2</i>                                                  |
| YPM220 | <i>MATa pRS306-ProteinA-3TEV-dia2-(1-724) pep4Δ::ADE2</i>                                             |

**Table S1, Related to Figures 1-4.**

Strains used in this study (all based on the W303 strain background).
